# Supplementary material for: p53, cathepsin D, Bcl-2 are joint prognostic indicators of breast cancer metastatic spreading
Source: BMC Cancer. 2016 Aug 18;16:649. doi: 10.1186/s12885-016-2713-3 (PMC4991058; doi:10.1186/s12885-016-2713-3)
Supplement: Additional file 2: Table S2A. — IHC analysis of consensus parameters of relapsed versus control BC cases. Table S2B. Invasion and cell cycle/apoptosis parameters of relapsed versus control BC cases. (XLSX 150 kb) [file 12885_2016_2713_MOESM2_ESM.xlsx]

## Sheet: Table S2A
Table S2A. IHC analysis of consensus parameters of relapsed versus control breast cancer cases.
Cases	Ki-67 1						Ki-67 2						Cyclin D1 1						Cyclin D1 2						Cyclin E 1						Cyclin E 2						p53 1						p53 2						ER 1
	% n	int	% n	int	% n	int	% n	int	% n	int	% n	int	% n	int	% n	int	% n	int	% n	int	% n	int	% n	int	% n	int	% n	int	% n	int	% n	int	% n	int	% n	int	% n	int	% n	int	% n	int	% n	int	% n	int	% n	int	% n
	A	A	B	B	C	C	A	A	B	B	C	C	A	A	B	B	C	C	A	A	B	B	C	C	A	A	B	B	C	C	A	A	B	B	C	C	A	A	B	B	C	C	A	A	B	B	C	C	A
1	0	0	0	0	0	0	0	0	0	0	0	0	na	na	0	0	0	0	0	0	0	0	70	1	na	na	0	0	0	0	na	na	0	0	0	0	5	1	13	1	16	1	7	1	56	1	18	1	0
2
3
4	0	0	na	na	na	na	0	0	na	na	na	na	0	0	na	na	na	na	0	0	na	na	na	na	0	0	na	na	na	na	0	0	na	na	na	na	22	2	na	na	na	na	15	3	na	na	na	na	0
5
6
7
8	1	2	0	0	7	2	1	2	0	0	15	2	3	2	0	0	5	2	0	0	0	0	9	2	0	0	0	0	0	0	0	0	0	0	0	0	0	0	0	0	0	0	0	0	0	0	0	0	0
9	0	0	0	0	0	0	0	0	0	0	0	0	48	2	64	2	33	2	39	2	81	2	31	3	0	0	0	0	0	0	0	0	0	0	0	0	53	1	87	2	95	2	67	1	79	2	80	2	97
10
11
12
13
14	6	2	16	2	na	na	8	2	13	2	na	na	0	0	3	1	na	na	0	0	1	2	na	na	na	na	2	1	0	0	na	na	5	1	0	0	0	0	0	0	1	1	5	3	9	3	0	0	0
15	0	0	0	0	0	0	0	0	0	0	0	0	1	2	1	2	0	0	0	0	0	0	0	0	53	2	42	2	50	2	27	2	18	2	44	2	97	3	89	3	98	3	91	3	87	3	94	3	0
16	na	na	0	0	0	0	na	na	0	0	0	0	na	na	na	na	na	na	na	na	na	na	na	na	na	na	0	0	0	0	na	na	0	0	na	na	na	na	0	0	na	na	na	na	0	0	na	na	na
17	0	0	0	0	1	1	0	0	0	0	0	0	0	0	0	0	2	1	0	0	0	0	5	2	0	0	0	0	0	0	0	0	0	0	0	0	0	0	0	0	2	1	0	0	0	0	7	1	0
18	1	1	0	0	2	1	0	0	0	0	0	0	2	1	0	0	3	1	0	0	0	0	4	1	0	0	0	0	0	0	0	0	0	0	0	0	0	0	0	0	0	0	0	0	0	0	0	0	4
19	7	2	12	2	10	2	8	3	6	1	15	2	24	2	4	1	12	1	17	1	33	1	7	2	0	0	0	0	0	0	0	0	0	0	0	0	57	2	78	2	79	2	59	1	75	2	88	2	0
20	0	0	0	0	0	0	0	0	0	0	0	0	0	0	0	0	0	0	0	0	0	0	0	0	0	0	0	0	0	0	0	0	0	0	0	0	0	0	1	1	2	1	0	0	3	1	5	1	0
21
22
23
24
25	0	0	1	1	1	1	0	0	0	0	0	0	13	2	37	2	24	2	10	1	33	2	17	2	0	0	0	0	0	0	0	0	0	0	0	0	0	0	0	0	0	0	0	0	0	0	0	0	87
26	0	0	0	0	0	0	0	0	0	0	0	0	2	1	1	1	na	na	0	0	0	0	na	na	0	0	0	0	0	0	0	0	0	0	0	0	0	0	0	0	na	na	0	0	0	0	na	na	0
27	0	0	0	0	0	0	0	0	0	0	0	0	3	1	na	na	4	1	0	0	na	na	24	1	0	0	0	0	0	0	0	0	0	0	0	0	0	0	0	0	0	0	0	0	0	0	0	0	6
28	0	0	0	0	na	na	0	0	0	0	na	na	0	0	0	0	na	na	0	0	0	0	na	na	0	0	0	0	na	na	0	0	0	0	na	na	12	1	7	1	na	na	17	2	1	1	na	na	0
29	0	0	0	0	0	0	0	0	0	0	0	0	0	0	0	0	0	0	0	0	0	0	0	0	0	0	0	0	0	0	0	0	0	0	0	0	0	0	0	0	0	0	1	2	1	1	0	0	5
30	0	0	0	0	0	0	0	0	0	0	0	0	81	2	na	na	na	na	44	2	na	na	na	na	0	0	0	0	na	na	0	0	0	0	na	na	0	0	0	0	0	0	0	0	0	0	0	0	0
31	0	0	3	2	7	2	0	0	9	2	7	2	0	0	6	2	2	1	0	0	12	2	13	1	0	0	0	0	0	0	0	0	0	0	0	0	42	2	40	3	14	3	30	2	57	3	5	3	0
32
33
34	0	0	0	0	0	0	0	0	0	0	0	0	0	0	3	1	6	1	0	0	14	1	41	2	0	0	0	0	0	0	0	0	0	0	0	0	0	0	0	0	0	0	0	0	0	0	0	0	53
35	9	2	26	2	25	3	6	2	6	3	11	3	64	2	72	3	60	2	59	2	36	3	60	2	0	0	0	0	0	0	0	0	0	0	0	0	0	0	0	0	0	0	0	0	0	0	0	0	100
36
37
38	na	na	13	2	16	2	na	na	6	3	11	3	na	na	34	2	19	3	na	na	18	3	12	3	0	0	0	0	0	0	0	0	0	0	0	0	na	na	0	0	0	0	na	na	0	0	0	0	na
39	0	0	0	0	1	1	0	0	0	0	1	1	0	0	0	0	0	0	0	0	0	0	0	0	0	0	0	0	0	0	0	0	0	0	0	0	0	0	0	0	4	4	0	0	0	0	5	2	0
40	2	1	0	0	0	0	0	0	0	0	0	0	0	0	0	0	0	0	0	0	0	0	0	0	0	0	0	0	0	0	0	0	0	0	0	0	0	0	0	0	0	0	0	0	0	0	0	0	77
41	1	1	3	1	1	1	2	1	0.5	1	1	1	39	2	42	2	32	2	11	2	39	2	28	2	0	0	0	0	0	0	0	0	0	0	0	0	3	2	10	2	3	2	2	2	6	2	1	2	4
42	na	na	1	2	0	0	na	na	0	0	0	0	na	na	49	2	46	2	na	na	49	2	59	3	na	na	1	1	0	0	na	na	2	1	0	0	na	na	0	0	0	0	na	na	0	0	0	0	na
43	6	1	1	1	3	1	1	2	0.5	1	1	1	77	3	71	3	93	3	22	3	36	3	71	3	1	1	0	0	3	1	0.5	1	0	0	1	1	68	2	62	2	71	2	89	2	87	2	93	2	0
44	3	2	3	2	5	2	0	0	3	2	2	2	34	3	66	3	81	3	8	3	32	3	74	3	0	0	0	0	1	1	0	0	0	0	0.5	1	3	1	18	2	22	2	1	3	2	3	5	3	19
45	na	na	na	na	0	0	na	na	na	na	0	0	na	na	na	na	0	0	na	na	na	na	0	0	na	na	na	na	0	0	na	na	na	na	1	1	na	na	na	na	0	0	na	na	na	na	1	2	na
46	1	1	4	1	2	1	2	1	3	1	2	1	63	2	67	2	65	2	61	2	60	2	44	2	0	0	0	0	4	1	0	0	0	0	3	1	0	0	4	1	3	1	0	0	1	3	1	3	0
47	20	2	3	2	19	2	9	2	2	2	1	2	47	3	19	3	33	3	59	2	25	2	20	2	3	1	2	2	5	1	2	1	0.5	1	5	1	0	0	0	0	0	0	0	0	1	1	0	0	14
48	9	1	15	1	23	2	5	2	13	2	69	2	51	2	61	2	72	2	74	1	68	1	62	2	0	0	0	0	0	0	0	0	0	0	0	0	80	2	97	2	98	3	44	2	98	2	71	3	93
49	na	na	2	1	0	0	na	na	1	1	0	0	na	na	70	3	26	2	na	na	44	3	6	2	na	na	0	0	0	0	na	na	0	0	0	0	na	na	0	0	0	0	na	na	1	2	0	0	na
50	6	2	9	2	3	2	2	3	2	1	1	2	68	2	89	3	80	2	10	3	22	3	61	2	0	0	0	0	0	0	0	0	0	0	0	0	2	1	28	1	0	0	1	2	16	2	0	0	91
51	0	0	0	0	na	na	0	0	0	0	na	na	0	0	na	na	na	na	0	0	na	na	na	na	0	0	na	na	na	na	0	0	na	na	na	na	0	0	0	0	0	0	0	0	0	0	0	0	1
52	3	1	5	2	7	1	3	1	5	2	4	1	80	2	37	2	77	2	74	2	11	2	38	2	3	1	1	1	2	1	2	1	0.5	1	2	1	5	2	9	1	13	1	3	3	2	2	1	3	93
53	12	2	9	2	6	2	12	1	8	1	1	2	73	2	88	2	68	2	45	2	33	2	48	2	0	0	0	0	0	0	0	0	0	0	0	0	4	1	5	1	4	1	2	2	1	1	2	2	79
		Legend: Histoype: tumor histotype (DI: ductal infiltrating; LI: lobular infiltrating; DLI: ducto-lobular infiltrating; Muc: mucinous); pT: pathological tumor stage; Ø cm: tumor diameter in cm; pN: pathological lymph node stage; L tot: number of total excised lymph nodes; L meta: number of metastatic lymph nodes; pM: pathological metastatic stage; ER: estrogen receptor; PgR: progesterone receptor;…
[truncated: 23 more columns]

## Sheet: Table S2B
Table S2B. Invasion and cell cycle/apoptosis parameters of relapsed versus control breast cancer cases.
Case	uPA 1												uPA 2												PAI-1 1												PAI-1 2												MMP-11 1
	% c	int	Stroma	Matrix	% c	int		Matrix	% c	int	Stroma	Matrix	% c	int	Stroma	Matrix	% c	int	Stroma	Matrix	% c	int	Stroma	Matrix	% c	int	Stroma	Matrix	% c	int	Stroma	Matrix	% c	int	Stroma	Matrix	% c	int	Stroma	Matrix	% c	int	Stroma	Matrix	% c	int	Stroma	Matrix	% c
	A	A	A	A	B	B	B	B	C	C	C	C	A	A	A	A	B	B	B	B	C	C	C	C	A	A	A	A	B	B	B	B	C	C	C	C	A	A	A	A	B	B	B	B	C	C	C	C	A
1	na	na	na	na	60	1	0	0	72	1	0	0	na	na	na	na	28	1	0	0	44	1	0	0	na	na	na	na	98	2	1	1	98	3	1	1	na	na	na	na	99	2	0	0	100	3	1	0	na
4	91	1	1	1	na	na	na	na	na	na	na	na	90	1	0	0	na	na	na	na	na	na	na	na	0	0	0	0	na	na	na	na	na	na	na	na	0	0	0	0	na	na	na	na	na	na	1	1	0
8	1	1	1	1	4	1	1	1	na	na	1	na	na	na	na	na	0	0	0	0	na	na	na	na	22	1	0	0	33	2	0	0	na	na	na	na	0	0	0	0	77	1	0	0	na	na	na	na	14
9	98	1	1	1	97	2	1	0	95	1	0	0	94	1	1	0	83	2	1	0	94	1	1	0	0	0	0	0	0	0	0	0	0	0	0	0	0	0	0	0	0	0	0	0	0	0	0	0	0
14	0	0	na	1	5	1	0	0	0	0	1	1	0	0	na	na	0	0	0	0	0	0	na	na	na	na	na	na	0	0	0	0	0	0	0	0	na	na	na	na	0	0	0	0	0	0	0	0	na
15	0	0	1	0	0	0	1	?	0	0	na	0	0	0	1	0	0	0	0	0	0	0	0	0	1	1	0	0	5	1	0	0	10	1	0	0	0	0	0	0	0	0	0	0	0	0	0	0	17
16	na	na	na	na	90	2	1	1	na	na	1	na	na	na	na	na	62	3	0	1	na	na	na	na	na	na	na	na	60	3	0	1	na	na	na	na	na	na	na	na	69	3	0	1	na	na	0	0	na
17	91	1	1	0	98	2	1	1	93	2	1	0	98	1	1	0	97	3	1	0	100	1	1	0	0	0	0	0	0	0	0	0	0	0	0	0	0	0	0	0	0	0	0	0	0	0	0	0	0
18	94	1	1	0	91	2	1	0	24	2	1	0	93	1	0	0	92	1	1	0	14	1	0	0	0	0	0	0	0	0	0	0	0	0	0	0	0	0	0	0	0	0	0	0	0	0	0	0	0
19	85	1	1	1	82	1	1	0	77	1	1	0	0	0	1	0	0	0	1	0	59	1	1	0	0	0	0	0	0	0	0	0	0	0	0	0	0	0	0	0	0	0	0	0	0	0	0	0	0
20	96	1	1	0	95	1	1	0	92	1	1	0	93	1	1	0	97	1	1	0	94	1	1	0	0	0	0	0	0	0	0	0	0	0	0	0	0	0	0	0	0	0	0	0	0	0	0	0	0
25	98	2	1	1	100	2	1	0	98	2	na	0	100	2	1	0	96	3	1	0	94	3	0	0	0	0	0	0	0	0	0	0	0	0	0	0	0	0	0	0	0	0	0	0	0	0	0	0	15
26	97	1	1	0	98	2	1	0	na	na	1	na	89	2	1	0	100	2	0	0	na	na	na	na	0	0	0	0	0	0	0	0	na	na	na	na	0	0	0	0	0	0	0	0	na	na	0	0	0
27	80	1	0	0	89	2	1	0	92	2	na	0	63	2	0	0	61	2	0	0	76	2	1	0	0	0	0	0	0	0	0	0	0	0	0	0	0	0	na	na	0	0	0	0	0	0	0	0	0
28	na	na	na	na	99	2	1	0	na	na	1	na	na	na	0	0	95	2	1	0	na	na	na	na	0	0	0	0	0	0	0	0	na	na	na	na	0	0	na	na	0	0	0	0	na	na	na	na	0
29	100	1	1	na	94	2	1	0	89	1	na	0	90	2	1	0	93	2	1	0	92	1	0	0	0	0	0	0	0	0	0	0	0	0	0	0	0	0	0	0	0	0	0	0	0	0	0	0	60
30	98	1	0	0	na	na	na	na	na	na	1	na	78	1	1	0	na	na	na	na	na	na	1	na	0	0	0	0	0	0	0	0	na	na	na	na	0	0	0	0	0	0	0	0	na	na	na	na	0
31	93	2	?	0	81	1	1	0	90	1	1	0	97	2	1	0	74	2	1	0	94	1	1	0	0	0	0	0	0	0	0	0	0	0	0	0	0	0	0	0	0	0	0	0	0	0	0	0	16
34	89	1	0	0	97	1	1	0	71	1	1	0	84	1	0	0	96	1	1	0	73	1	1	0	0	0	0	0	0	0	0	0	0	0	0	0	0	0	0	0	0	0	0	0	0	0	0	0	0
35	80	2	1	1	95	2	1	1	89	2	1	?	80	2	1	0	77	2	1	0	91	2	1	0	0	0	0	0	0	0	0	0	0	0	0	0	0	0	0	0	0	0	0	0	0	0	0	0	0
38	96	2	0	0	100	3	1	1	95	2	1	1	62	1	0	0	91	3	1	1	78	2	1	0	0	0	0	0	0	0	0	0	0	0	0	0	0	0	0	0	0	0	0	0	0	0	0	0	na
39	98	1	na	na	80	2	1	0	77	2	1	0	63	2	0	0	93	2	0	0	98	1	0	0	0	0	0	0	0	0	0	0	12	1	0	?	0	0	0	0	0	0	0	0	0	0	0	0	24
40	97	2	1	0	97	2	1	0	90	2	1	0	92	2	1	0	97	3	1	0	91	2	na	na	0	0	0	0	0	0	0	0	0	0	0	0	0	0	0	0	0	0	0	0	0	0	0	0	77
41	36	1	0	0	65	1	0	0	73	1	0	0	0	0	0	0	55	1	1	0	76	1	1	0	5	2	0	0	92	1	0	0	91	2	1	0	4	3	0	0	15	3	1	0	89	1	1	0	4
42	na	na	na	na	6	1	0	?	7	1	1	1	na	na	na	na	0	0	0	0	0	0	0	0	na	na	na	na	84	1	0	0	46	1	0	0	na	na	na	na	67	1	0	0	0	0	0	0	na
43	0	0	0	0	0	0	0	0	0	0	0	0	0	0	0	0	0	0	0	0	0	0	0	0	3	1	0	0	93	1	?	0	91	1	0	0	0	0	1	0	11	1	1	0	0	0	1	0	0
44	44	1	1	1	96	1	1	1	93	1	1	1	0	0	1	1	79	1	1	0	45	1	0	0	20	1	0	0	90	1	0	0	94	2	0	0	4	3	0	0	12	1	0	0	64	3	1	0	5
45	na	na	na	na	na	na	na	na	na	na	na	na	na	na	na	na	na	na	na	na	na	na	1	1	na	na	na	na	na	na	na	na	na	na	na	na	na	na	na	na	na	na	na	na	na	na	1	1	na
46	70	1	0	1	42	1	0	1	34	1	1	1	49	1	1	1	37	1	0	0	0	0	0	0	2	1	0	0	46	2	0	0	87	2	0	0	0	0	0	0	18	2	0	0	59	1	0	0	0
47	0	0	1	1	12	1	0	1	0	0	1	1	0	0	1	1	11	1	1	1	0	0	0	1	2	1	0	0	17	1	?	1	52	1	0		0	0	1	0	0	0	0	1	32	1	0	0	3
48	29	1	1	1	93	1	1	1	2	1	1	1	0	0	0	1	28	1	1	1	0	0	0	0	27	1	0	0	87	2	0	0	93	2	?	0	28	2	0	0	77	1	0	0	79	1	1	0	0
49	na	na	na	na	97	1	1	1	20	1	0	1	na	na	na	na	76	1	1	1	0	0	0	1	na	na	na	na	63	1	0	0	55	2	0	?	na	na	na	na	69	1	0	0	58	2	1	0	na
50	92	1	0	0	74	1	0	1	4	1	1	1	36	1	0	0	39	1	1	1	0	0	0	0	0	0	0	0	28	1	0	0	27	1	0	0	0	0	0	0	0	0	0	0	13	1	0	0	0
51	na	na	na	na	na	na	na	na	na	na	na	na	na	na	na	na	na	na	na	na	na	na	na	na	na	na	na	na	na	na	na	na	na	na	na	na	na	na	na	na	na	na	na	na	na	na	0	0	0
52	98	2	1	1	87	2	1	1	87	2	1	0	96	1	1	0	83	2	1	0	89	1	1	0	66	1	0	0	93	2	0	0	88	2	0	0	0	0	1	0	92	2	0	0	84	2	1	0	3
53	97	2	1	0	98	2	1	0	98	3	1	0	98	1	1	0	100	2	1	0	91	3	1	0	10	1	0	0	32	1	0	0	47	1	0	0	5	1	0	0	9	1	0	0	21	1	0	0	0
[truncated: 107 more columns]
